# Supplementary material for: Emotional impact on healthcare providers involved in medical assistance in dying (MAiD): a systematic review and qualitative meta-synthesis
Source: HighWire-hosted journal article supplement (doi:10.1136/bmjopen-2021-058523), 2022-07-01

Supplementary appendix 1:

Database: Ovid MEDLINE(R) ALL &lt;1946 to October 04, 2021&gt;

Search Strategy:

- 
- 1 euthanasia, active/ or euthanasia, active, voluntary/ or hospice care/ or suicide, assisted/ (14808)
  - 2 terminally ill/ (6684)
  - 3 Right to die/ (4950)
  - 4 Terminal care/ (29907)
  - 5 advance care planning/ or advance directives/ (9125)
  - 6 ((dying or death or euthan\* or suicide or terminal\* ill\*) adj5 (assist\* or hasten\*)).tw,kf. (5952)
  - 7 Palliative care/ (58012)
  - 8 exp Practice Patterns, Physicians'/es [Ethics] (812)
  - 9 physician's role/ (30584)
  - 10 Health Personnel/ (52294)
  - 11 ((health care provider or clinician\* or doctor\* or physician\* or nurse or social work\* or oncologist\* or palliative physician or nursing or psychiatrist\* or psychologist\* or psychotherapist\*) adj3 (experience\* or emotion\* or feeling\*)).tw,kf. (23976)
  - 12 (Interview: or experience:).mp. or qualitative.tw. (1655368)
  - 13 health personnel/ or allied health personnel/ or anesthetists/ or caregivers/ or case managers/ or "coroners and medical examiners"/ or emergency medical dispatcher/ or epidemiologists/ or faculty, medical/ or faculty, nursing/ or health educators/ or health facility administrators/ or medical chaperones/ or medical laboratory personnel/ or medical staff/ or exp nurses/ or nursing staff/ or occupational therapists/ or personnel, hospital/ or pharmacists/ or physical therapists/ or physician executives/ or exp physicians/ (431546)
  - 14 (ethnograph\* or grounded theory or qualitative research or thematic analysis or semi-structured interview\* or narrative inquiry or focus\* group or content analysis or discourse or lived life experience\*).tw,kf. (156494)
  - 15 aid in dying.mp. (243)
  - 16 death with dignity.mp. (607)
  - 17 Bill C-14.mp. (24)
  - 18 Bill C-7.mp. (2)
  - 19 MAID.mp. (458)
  - 20 physician assisted death.mp. (309)
  - 21 physician assisted dying.mp. (142)
  - 22 (assisted suicide or physician assisted suicide).tw,kf. (3163)
  - 23 Qualitative Research/ (67825)
  - 24 1 or 2 or 3 or 4 or 5 or 6 or 15 or 16 or 17 or 18 or 19 or 20 or 21 or 22 (55486)
  - 25 7 or 8 or 9 or 10 or 11 or 13 (527655)
  - 26 12 or 14 or 23 (1692068)
  - 27 24 and 25 and 26 (5490)
  - 28 limit 27 to dt=19460101-20210430 [January 1st, 1946 to April 30th, 2021] (5441)
  - 29 limit 28 to english language (5073)
  - 30 limit 29 to abstracts (4876)

\*\*\*\*\*

Grey Literature databases (December 10<sup>th</sup> 2018 to March 1<sup>st</sup>, 2019, updated August 2020 and 2021)

Total # Records after de-duplication: 13. Records selected after applying critical appraisal tool 8.

| Database                                        | Search strategy                                                                                                                                                                              | #records screened | # new records and records after de-duplication and applying the critical appraisal tool |
|-------------------------------------------------|----------------------------------------------------------------------------------------------------------------------------------------------------------------------------------------------|-------------------|-----------------------------------------------------------------------------------------|
| Google scholar                                  | With the exact phrase: "Medical assistance in dying" ; "physician assisted suicide"; With all the words: "emotional impact on health care providers involved in medical assistance in dying" | 400               | 5                                                                                       |
| Des Lebris/Canadian Electronic Library          | Medical assistance in dying                                                                                                                                                                  | 5                 | 0                                                                                       |
| Canadian Institute of Health Information (CIHI) | Medical assistance in dying                                                                                                                                                                  | 7                 | 0                                                                                       |
| OAlster database (includes WordCAT)             | Medical Assistance in dying, Physician assisted suicide as key word                                                                                                                          | 206               | 2                                                                                       |
| OpenGrey                                        | Medical assistance in dying, Physician Assisted suicide as key word                                                                                                                          | 4                 | 0                                                                                       |
| BASE ( Bielefeld Academic Search Engine)        | Subject Heading search: "Medical Assistance in dying"                                                                                                                                        | 670               | 1                                                                                       |

## Selected records:

## Google scholar included Results:

1. Beuthin R. Cultivating Compassion: The Practice Experience of a Medical Assistance in Dying Coordinator in Canada. *Qualitative Health Research*. 2018;28(11):1679-1691. doi:[10.1177/1049732318788850](https://doi.org/10.1177/1049732318788850)
2. Bouthillier M-E, Opatrny L. A qualitative study of physicians' conscientious objections to medical aid in dying. *Palliative Medicine*. 2019;33(9):1212-1220. doi:[10.1177/0269216319861921](https://doi.org/10.1177/0269216319861921)
3. Bruce A, Beuthin R. Medically Assisted Dying in Canada: "Beautiful Death" Is Transforming Nurses' Experiences of Suffering. *Canadian Journal of Nursing Research*. June 2019. doi:[10.1177/0844562119856234](https://doi.org/10.1177/0844562119856234)
4. Alison A. Townsley. Putting a Bow on Death and Dying-Health Care Professionals' Experiences with Medical Assistance in Dying (MAiD): A Foucauldian Discourse Analysis with Agambian Insights. [Practice Based Research Paper on the Internet]. York University School of Social Work;2018. [Cited February 28,2019] Available from: [https://yorkspace.library.yorku.ca/xmlui/bitstream/handle/10315/35613/Alison\\_Townsley\\_PRP\\_2018.pdf?sequence=1](https://yorkspace.library.yorku.ca/xmlui/bitstream/handle/10315/35613/Alison_Townsley_PRP_2018.pdf?sequence=1)
5. Gamondi C, Borasio GD, Oliver P, Preston N, Payne S. Responses to assisted suicide requests: an interview study with Swiss palliative care physicians. *BMJ Support Palliat Care*. 2019 Mar;9(1):e7. doi: 10.1136/bmjspcare-2016-001291. Epub 2017 Aug 11. Available from <https://pubmed.ncbi.nlm.nih.gov/28801317/>

## OAlster included Results:

1. Implementing Medical Aid-in-Dying in Vermont: a Qualitative Study. *J GEN INTERNMED* **34**, 636–641 (2019). <https://doi.org/10.1007/s11606-018-4811-1>
2. Allyson Oliphant. "If Not Me, Then Who?" The Narratives of Medical Aid in Dying (MAiD) Providers and Supporters Around Their Professional Identity and Role in MAiD [Thesis on the Internet]. MacMaster University; 2017. [Cited on February 10, 2019]. Available from <http://hdl.handle.net/11375/22146>

## BASE included results:

1. Sheridan, Laura, "When Patients Ask to Die: The Role of Nurses in Medical Assistance in Dying" (2017). Electronic Thesis and Dissertation Repository. 5041. <https://ir.lib.uwo.ca/etd/5041>

**Database:**

Embase &lt;1974 to 2021 April 30&gt;

| #  | Query                                                                                                                                                                                                                                                                                                                                                                                                                                       | Results from search strategy run on October 4, 2021 |
|----|---------------------------------------------------------------------------------------------------------------------------------------------------------------------------------------------------------------------------------------------------------------------------------------------------------------------------------------------------------------------------------------------------------------------------------------------|-----------------------------------------------------|
| 1  | euthanasia, active/ or euthanasia, active, voluntary/ or hospice care/ or suicide, assisted/                                                                                                                                                                                                                                                                                                                                                | 18,815                                              |
| 2  | terminally ill/                                                                                                                                                                                                                                                                                                                                                                                                                             | 8,339                                               |
| 3  | right to die/                                                                                                                                                                                                                                                                                                                                                                                                                               | 4,060                                               |
| 4  | terminal care/                                                                                                                                                                                                                                                                                                                                                                                                                              | 38,968                                              |
| 5  | advance care planning/ or advance directives/                                                                                                                                                                                                                                                                                                                                                                                               | 13,209                                              |
| 6  | ((dying or death or euthan* or suicide or terminal* ill*) adj5 (assist* or hasten*)).tw,kf.                                                                                                                                                                                                                                                                                                                                                 | 7,430                                               |
| 7  | palliative care/                                                                                                                                                                                                                                                                                                                                                                                                                            | 83,687                                              |
| 8  | exp clinical practice/ and medical ethics/                                                                                                                                                                                                                                                                                                                                                                                                  | 5,575                                               |
| 9  | physician's role/                                                                                                                                                                                                                                                                                                                                                                                                                           | 49,149                                              |
| 10 | health personnel/                                                                                                                                                                                                                                                                                                                                                                                                                           | 168,037                                             |
| 11 | ((health care provider or clinician* or doctor* or physician* or nurse or social work* or oncologist* or palliative physician or nursing or psychiatrist* or psychologist* or psychotherapist*) adj3 (experience* or emotion* or feeling*)).tw,kf.                                                                                                                                                                                          | 34,589                                              |
| 12 | (interview: or experience:).mp. or qualitative.tw.                                                                                                                                                                                                                                                                                                                                                                                          | 2,361,122                                           |
| 13 | health personnel/ or allied health personnel/ or anesthetists/ or caregivers/ or case managers/ or "coroners and medical examiners"/ or emergency medical dispatcher/ or epidemiologists/ or faculty, medical/ or faculty, nursing/ or health educators/ or health facility administrators/ or medical occupational therapists/ or personnel, hospital/ or pharmacists/ or physical therapists/ or physician executives/ or exp physicians/ | 1,402,853                                           |
| 14 | (ethnograph* or grounded theory or qualitative research or thematic analysis or semi-structured interview* or narrative inquiry or focus* group or content analysis or discourse or lived life experience*).tw,kf.                                                                                                                                                                                                                          | 203,129                                             |
| 15 | aid in dying.mp.                                                                                                                                                                                                                                                                                                                                                                                                                            | 293                                                 |
| 16 | death with dignity.mp.                                                                                                                                                                                                                                                                                                                                                                                                                      | 655                                                 |
| 17 | Bill C-14.mp.                                                                                                                                                                                                                                                                                                                                                                                                                               | 32                                                  |
| 18 | Bill C-7.mp.                                                                                                                                                                                                                                                                                                                                                                                                                                | 4                                                   |
| 19 | MAID.mp.                                                                                                                                                                                                                                                                                                                                                                                                                                    | 667                                                 |

|    |                                                                            |           |
|----|----------------------------------------------------------------------------|-----------|
| 20 | physician assisted death.mp.                                               | 365       |
| 21 | physician assisted dying.mp.                                               | 171       |
| 22 | (assisted suicide or physician assisted suicide).tw,kf.                    | 3,620     |
| 23 | qualitative research/                                                      | 98,864    |
| 24 | 1 or 2 or 3 or 4 or 5 or 6 or 15 or 16 or 17 or 18 or 19 or 20 or 21 or 22 | 73,993    |
| 25 | 7 or 8 or 9 or 10 or 11 or 13                                              | 1,525,230 |
| 26 | 12 or 14 or 23                                                             | 2,406,823 |
| 27 | 24 and 25 and 26                                                           | 8,659     |
| 28 | limit 27 to (abstracts and english language and yr="1946 - 2021")          | 7,666     |

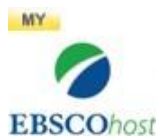

CINAHL search strategy: Monday, October 4, 2021 3:59:32 PM

| #   | Query                          | Limiters/Expanders                                                                                                                                                                                                     | Last Run Via                                                                                        | Results |
|-----|--------------------------------|------------------------------------------------------------------------------------------------------------------------------------------------------------------------------------------------------------------------|-----------------------------------------------------------------------------------------------------|---------|
| S25 | S22 AND S23 AND S24            | Limiters - Published Date: 19460401-20210430;<br>Exclude MEDLINE records; Publication Type: Abstract; Language: English<br>Expanders - Apply related words; Apply equivalent subjects<br>Search modes - Boolean/Phrase | Interface - EBSCOhost<br>Research Databases Search<br>Screen - Advanced Search<br>Database - CINAHL | Display |
| S24 | S10 OR S12 OR S21              | Expanders - Apply related words; Apply equivalent subjects<br>Search modes - Boolean/Phrase                                                                                                                            | Interface - EBSCOhost<br>Research Databases Search<br>Screen - Advanced Search<br>Database - CINAHL | Display |
| S23 | S6 OR S7 OR S8 OR S9<br>OR S11 | Expanders - Apply related words; Apply equivalent subjects<br>Search modes - Boolean/Phrase                                                                                                                            | Interface - EBSCOhost<br>Research Databases Search<br>Screen - Advanced Search<br>Database - CINAHL | Display |

|     |                                                                                               |                                                                                                          |                                                                                                         |         |
|-----|-----------------------------------------------------------------------------------------------|----------------------------------------------------------------------------------------------------------|---------------------------------------------------------------------------------------------------------|---------|
| S22 | (S1 OR S2 OR S3 OR S4<br>OR S5 OR S13 OR S14 OR S15 OR S16 OR<br>S17 OR S18 OR S19 OR S20)    | Expanders - Apply related<br>words; Apply equivalent<br>subjects<br><br>Search modes -<br>Boolean/Phrase | Interface - EBSCOhost<br>Research Databases Search<br>Screen - Advanced Search<br><br>Database - CINAHL | Display |
| S21 | qualitative research<br>words; Apply equivalent subjects<br><br>Search modes - Boolean/Phrase | Expanders - Apply related                                                                                | Interface - EBSCOhost<br>Research Databases Search<br>Screen - Advanced Search<br><br>Database - CINAHL | Display |
| S20 | TX (assisted suicide or<br>physician assisted suicide)                                        | Expanders - Apply related<br>words; Apply equivalent<br>subjects                                         | Interface - EBSCOhost<br>Research Databases Search<br>Screen - Advanced                                 | Display |

|                               |                                                               |                                                            | Search                                                                         |         |
|-------------------------------|---------------------------------------------------------------|------------------------------------------------------------|--------------------------------------------------------------------------------|---------|
| Search modes - Boolean/Phrase |                                                               |                                                            | Database - CINAHL                                                              |         |
| S19                           | physician assisted dying<br>words; Apply equivalent subjects  | Expanders - Apply related                                  | Interface - EBSCOhost<br>Research Databases Search<br>Screen - Advanced Search | Display |
| Search modes - Boolean/Phrase |                                                               |                                                            | Database - CINAHL                                                              |         |
| S18                           | physician assisted death<br>words; Apply equivalent subjects  | Expanders - Apply related                                  | Interface - EBSCOhost<br>Research Databases Search<br>Screen - Advanced Search | Display |
| Search modes - Boolean/Phrase |                                                               |                                                            | Database - CINAHL                                                              |         |
| S17                           | MAID<br>subjects                                              | Expanders - Apply related words; Apply equivalent subjects | Interface - EBSCOhost<br>Research Databases Search<br>Screen - Advanced Search | Display |
| Search modes - Boolean/Phrase |                                                               |                                                            | Database - CINAHL                                                              |         |
| S16                           | Bill C-7<br>subjects                                          | Expanders - Apply related words; Apply equivalent subjects | Interface - EBSCOhost<br>Research Databases Search<br>Screen - Advanced Search | Display |
| Search modes - Boolean/Phrase |                                                               |                                                            | Database - CINAHL                                                              |         |
| S15                           | Bill C-14<br>equivalent subjects                              | Expanders - Apply related words; Apply equivalent subjects | Interface - EBSCOhost<br>Research Databases Search<br>Screen - Advanced Search | Display |
| Search modes - Boolean/Phrase |                                                               |                                                            | Database - CINAHL                                                              |         |
| S14                           | death with dignity<br>words; Apply equivalent subjects        | Expanders - Apply related                                  | Interface - EBSCOhost<br>Research Databases Search<br>Screen - Advanced Search | Display |
| Search modes - Boolean/Phrase |                                                               |                                                            | Database - CINAHL                                                              |         |
| S13                           | aid in dying<br>equivalent subjects                           | Expanders - Apply related words; Apply equivalent subjects | Interface - EBSCOhost<br>Research Databases Search<br>Screen - Advanced Search | Display |
| Search modes - Boolean/Phrase |                                                               |                                                            | Database - CINAHL                                                              |         |
| S12                           | TX (ethnograph* or grounded theory or qualitative research or | Expanders - Apply related words; Apply equivalent subjects | Interface - EBSCOhost<br>Research Databases Search<br>Screen - Advanced        | Display |

|     |                                                                                                                                                                                                                                                                                                                                                                                                                                                                                                                 |                                                                                             |                                                                                               |         |
|-----|-----------------------------------------------------------------------------------------------------------------------------------------------------------------------------------------------------------------------------------------------------------------------------------------------------------------------------------------------------------------------------------------------------------------------------------------------------------------------------------------------------------------|---------------------------------------------------------------------------------------------|-----------------------------------------------------------------------------------------------|---------|
|     | thematic synthesis or semi-structured interview* or narrative inquiry or focus* group or content analysis or discourse or lived life experience*)                                                                                                                                                                                                                                                                                                                                                               | Search modes - Boolean/Phrase                                                               | Search Database - CINAHL                                                                      |         |
| S11 | health personnel or allied health personnel or anesthetists or caregivers or case managers or "coroners and medical examiners" or emergency medical dispatcher or epidemiologists or faculty, medical or faculty, nursing or health educators or health facility administrators or medical chaperones or medical laboratory personnel or medical staff or nurses or nursing staff or occupational therapists or personnel, hospital or pharmacists or physical therapists or physician executives or physicians | Expanders - Apply related words; Apply equivalent subjects<br>Search modes - Boolean/Phrase | Interface - EBSCOhost Research Databases Search Screen - Advanced Search<br>Database - CINAHL | Display |
| S10 | TX (interview: or experience:) or qualitative                                                                                                                                                                                                                                                                                                                                                                                                                                                                   | Expanders - Apply related words; Apply equivalent subjects<br>Search modes - Boolean/Phrase | Interface - EBSCOhost Research Databases Search Screen - Advanced Search<br>Database - CINAHL | Display |
| S9  | TX ((health care provider or clinician* or doctor* or physician* or nurse or social work* or oncologist* or palliative physician or nursing or psychiatrist* or psychologist* or psychotherapist*) N3 (experience* or emotion* or feeling*))                                                                                                                                                                                                                                                                    | Expanders - Apply related words; Apply equivalent subjects<br>Search modes - Boolean/Phrase | Interface - EBSCOhost Research Databases Search Screen - Advanced Search<br>Database - CINAHL | Display |



|    |                                                                                                                                        |                                                                                                 |                                                                                                   |          |
|----|----------------------------------------------------------------------------------------------------------------------------------------|-------------------------------------------------------------------------------------------------|---------------------------------------------------------------------------------------------------|----------|
| S8 | health personnel or healthcare professionals or healthcare workers                                                                     | Expanders - Apply related words; Apply equivalent subjects<br><br>Search modes - Boolean/Phrase | Interface - EBSCOhost Research Databases Search Screen - Advanced Search<br><br>Database - CINAHL | Display  |
| S7 | physician role                                                                                                                         | Expanders - Apply related words; Apply equivalent subjects<br><br>Search modes - Boolean/Phrase | Interface - EBSCOhost Research Databases Search Screen - Advanced Search<br><br>Database - CINAHL | Display  |
| S6 | practice patterns, physicians AND medical ethics                                                                                       | Expanders - Apply related words; Apply equivalent subjects<br><br>Search modes - Boolean/Phrase | Interface - EBSCOhost Research Databases Search Screen - Advanced Search<br><br>Database - CINAHL | Display  |
| S5 | TX ((dying or death or euthan* or suicide or terminal* ill*) N5 (assist* or hasten*))                                                  | Expanders - Apply related words; Apply equivalent subjects<br><br>Search modes - Boolean/Phrase | Interface - EBSCOhost Research Databases Search Screen - Advanced Search<br><br>Database - CINAHL | Display  |
| S4 | advance care planning or end of life planning or advance directive or advance care plan or advance decision or advance helth care plan | Expanders - Apply related words; Apply equivalent subjects<br><br>Search modes - Boolean/Phrase | Interface - EBSCOhost Research Databases Search Screen - Advanced Search<br><br>Database - CINAHL | Display  |
| S3 | terminal care or palliative care or end of life care or hospice                                                                        | Expanders - Apply related words; Apply equivalent subjects<br><br>Search modes - Boolean/Phrase | Interface - EBSCOhost Research Databases Search Screen - Advanced Search<br><br>Database - CINAHL | Display  |
| S2 | terminally ill                                                                                                                         | Expanders - Apply related words; Apply equivalent subjects<br><br>Search modes - Boolean/Phrase | Interface - EBSCOhost Research Databases Search Screen - Advanced Search<br><br>Database - CINAHL | Display  |
| S1 | euthanasia or assisted suicide or right to die or physician assisted suicide                                                           | or death with dignity                                                                           | Expanders - Apply related words; Apply equivalent                                                 | subjects |

Total Number of records from  
CINAHL search strategy: 262.



Brought to you by University of Ottawa / Université d'Ottawa

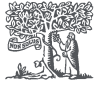

Scopus

Search Sources Lists

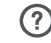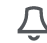

SD

# Saved searches

Combine queries...

e.g. #1 AND NOT #3

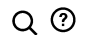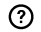

| ID  | Name     | Query                                                                           | Documents | Date last run | Actions |
|-----|----------|---------------------------------------------------------------------------------|-----------|---------------|---------|
| #33 | scopus 6 | (( {active euthanasia} / OR {voluntary euthanasia} / OR {hospi View More        | 8,905     | oct 4, 2021   | +       |
| #32 | scopus 5 | (( {active euthanasia} / OR {voluntary euthanasia} / OR {hospi View More        | 9,662     | oct 4, 2021   | +       |
| #31 | scopus 4 | (( {active euthanasia} / OR {voluntary euthanasia} / OR {hospi View More        | 9,711     | oct 4, 2021   | +       |
| #29 | Scopus   | (( {active euthanasia} / OR {voluntary euthanasia} / OR {hospi View More        | 10,097    | oct 4, 2021   | +       |
| #28 | 3        | ... View More                                                                   | 852,122   | oct 4, 2021   | +       |
| #27 | 2        | ( {palliative care} / ) OR ( {clinic al practice} AND {physician ethi View More | 1,458,970 | oct 4, 2021   | +       |

... View More

| ID  | Name                         | Query                                                          | Documents | Date last run | Actions |
|-----|------------------------------|----------------------------------------------------------------|-----------|---------------|---------|
| #26 | 1                            | {active euthanasia} / OR {voluntary euthanasia} / OR {hospice} | 127,545   | oct 4, 2021   | +       |
| #25 | terminally ill terminal care | {terminally ill} OR {terminal care}                            | 72,266    | oct 4, 2021   | +       |
| #24 | qualitative research         | {qualitative research}                                         | 570,500   | oct 4, 2021   | +       |
| #23 | physician assisted suicide   | {physician assisted suicide}                                   | 1,365     | oct 4, 2021   | +       |
| #22 | physician assisted dying     | {physician assisted dying}                                     | 90        | oct 4, 2021   | +       |
| #21 | physician assisted death     | {physician assisted death}                                     | 153       | oct 4, 2021   | +       |
| #20 | MAiD                         | {MAiD}                                                         | 11,549    | oct 4, 2021   | +       |
| #19 | Bill C-7                     | {Bill C-7}                                                     | 38        | oct 4, 2021   | +       |
| #18 | Bill C-14                    | {Bill C-14}                                                    | 120       | oct 4, 2021   | +       |
| #17 | death with dignity           | {death with dignity}                                           | 2,743     | oct 4, 2021   | +       |
|     |                              | ... View More                                                  |           |               |         |
| #16 | aid in dying                 | {aid in dying}                                                 | 823       | oct 4, 2021   | +       |
|     |                              | ... View More                                                  |           |               |         |
| #15 | qualitative methods          | TITLE-ABS-KEY ( ethnograph* OR "grounded theory" OR "the       | 439,839   | oct 4, 2021   | +       |

| ID  | Name                                    | Query                                                           | ... View More<br>Documents | Date last run | Actions |
|-----|-----------------------------------------|-----------------------------------------------------------------|----------------------------|---------------|---------|
| #14 | health care provider                    | TITLE-ABS-KEY ("allied health personnel" OR anesthetists OR     | 1,203,712                  | oct 4, 2021   | +       |
| #13 | qualitative interview qualitative study | TITLE-ABS-KEY ("qualitative interview" OR "qualitative study")  | 119,016                    | oct 4, 2021   | +       |
| #12 | health care provider experience         | (( "health care provider" OR clinician* OR doctor* OR physicia  | 85,449                     | oct 4, 2021   | +       |
| #11 | health personnel                        | {health personnel} /                                            | 195,852                    | oct 4, 2021   | +       |
| #10 | physicians role                         | {physician's role} /                                            | 31,290                     | oct 4, 2021   | +       |
| #9  | clinical practice physician ethics      | {clinical practice} AND {physician ethics}                      | 25                         | oct 4, 2021   | +       |
| #8  | palliative care                         | {palliative care} /                                             | 185,455                    | oct 4, 2021   | +       |
| #7  | assisted death                          | (( dying OR death OR euthan* OR suicide OR "terminal* ill*"     | 12,119                     | oct 4, 2021   | +       |
| #6  | advance care planning                   | {advance care planning} / OR {advance directives} /             | 27,184                     | oct 4, 2021   | +       |
| #5  | right to die                            | {right to die} /                                                | 8,046                      | oct 4, 2021   | +       |
| #3  | active euthanasia                       | {active euthanasia} / OR {voluntary euthanasia} / OR {hospice c | 38,053                     | oct 4, 2021   | +       |

^ Top of page

## About Scopus

[What is Scopus](#)

[Content coverage](#)

[Scopus blog](#)

[Scopus API](#)

[Privacy matters](#)

## Language

[日本語に切り替える](#)

[切换到简体中文](#)

[切换到繁體中文](#)

[Русский язык](#)

## Customer Service

[Help](#)

[Tutorials](#)

[Contact us](#)

---

## ELSEVIER

[Terms and conditions](#) ↗ [Privacy policy](#) ↗

Copyright © Elsevier B.V. ↗. All rights reserved. Scopus® is a registered trademark of Elsevier B.V.

We use cookies to help provide and enhance our service and tailor content. By continuing, you agree to the use of cookies.

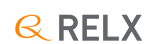

Supplement: bmjopen-2021-058523supp001_data_supplement.pdf [file bmjopen-2021-058523supp001_data_supplement.pdf]
